# Supplementary material for: Common Variants in CDKAL1, CDKN2A/B, IGF2BP2, SLC30A8, and HHEX/IDE Genes Are Associated With Type 2 Diabetes and Impaired Fasting Glucose in a Chinese Han Population
Source: Oxford University Press journal article supplement (doi:10.2337/db08-0047), 2008-07-16
Supplement: db08-00471_suppl.doc [file db08-00471_suppl.doc]

**Supplementary Table 1:** SNPs genotyped in the Chinese Han population

| db SNP ID | Gene | Major / minor allele | ORs previously reported(Refs) | Genotype | |  | MAF | | | | | Power† |
| --- | --- | --- | --- | --- | --- | --- | --- | --- | --- | --- | --- | --- |
| 11 / 12 / 22 | P (HWE) |  | Current Sample | CHB | JPT | CEU | YRI |
| rs10946398 | *CDKAL1* | [A/**C**] | 1.12 (12) | 1037 / 1563 / 580 | 0.83 |  | C: 0.428 | C: 0.411 | C: 0.378 | C: 0.308 | G: 0.333 | 0.32 |
| rs7754840 | *CDKAL1* | [G/**C**] | 1.12 (11) | 1041 / 1577 / 581 | 0.70 |  | C: 0.428 | C: 0.411 | C: 0.378 | C: 0.308 | G: 0.333 | 0.32 |
| rs7756992 | *CDKAL1* | [**G**/A] | 1.25 (9) | 862 / 1579 / 733 | 0.85 |  | A: 0.454 | G: 0.467 | G: 0.466 | G: 0.250 | A: 0.367 | 0.83 |
| rs9465871 | *CDKAL1* | [**C**/T] | 1.18 (8) | 898 / 1545 / 738 | 0.14 |  | T: 0.475 | C: 0.478 | C: 0.456 | C: 0.150 | T: 0.383 | 0.59 |
| rs10811661 | *CDKN2A/B* | [**T**/C] | 1.20 (12) | 905 / 1615 / 666 | 0.27 |  | C: 0.462 | C: 0.405 | C: 0.433 | C: 0.208 | C: 0.000 | 0.67 |
| rs564398 | *CDKN2A/B* | [**T**/C] | 1.12 (12) | 2383 / 750 / 41 | 0.04 |  | C: 0.131 | C: 0.067 | C: 0.102 | C: 0.375 | C: 0.000 | 0.18 |
| rs4402960 | *IGF2BP2* | [G/**T**] | 1.14 (12) | 1788 / 1196 / 199 | 0.96 |  | T: 0.250 | T: 0.222 | T: 0.311 | T: 0.292 | G: 0.450 | 0.33 |
| rs1470579 | *IGF2BP2* | [A/**C**] | 1.17 (10) | 1744 / 1238 / 191 | 0.14 |  | C: 0.255 | C: 0.256 | C: 0.352 | C: 0.292 | A: 0.133 | 0.45 |
| rs13266634 | *SLC30A8* | [**C**/T] | 1.18 (7) | 1054 / 1544 / 569 | 0.93 |  | T: 0.432 | T: 0.478 | T: 0.444 | T: 0.250 | T: 0.058 | 0.58 |
| rs1113132 | *EXT2* | [**C**/G] | 1.15 (7) | 1085 / 1554 / 543 | 0.74 |  | G: 0.415 | G: 0.352 | G: 0.344 | G: 0.300 | G: 0.075 | 0.45 |
| rs11037909 | *EXT2* | [**T**/C] | 1.27 (7) | 1095 / 1519 / 545 | 0.64 |  | C: 0.413 | C: 0.344 | C: 0.333 | C: 0.300 | C:0.158 | 0.88 |
| rs3740878 | *EXT2* | [**A**/G] | 1.26 (7) | 1020 / 1543 / 555 | 0.49 |  | G: 0.425 | G: 0.344 | G: 0.341 | G: 0.302 | G: 0.076 | 0.86 |
| rs7480010 | *LOC387761* | [A/**G**] | 1.14 (7) | 1881 / 1126 / 156 | 0.45 |  | G: 0.227 | G: 0.216 | G :0.227 | G: 0.246 | A: 0.000 | 0.31 |
| rs9300039 | *unknown* | [**C**/A] | 1.25 (11) | 1680 / 1245 / 231 | 0.99 |  | A: 0.270 | A: 0.300 | A: 0.278 | A: 0.108 | A: 0.169 | 0.76 |
| Beijing |  |  |  |  |  |  |  |  |  |  |  |  |
| rs1111875 * | *HHEX* | [A/**G**] | 1.19 (7) | 788 / 621 / 144 | 0.30 |  | G: 0.293 | G: 0.322 | G: 0.409 | G: 0.442 | G: 0.142 | 0.36 |
| rs5015480 * | *HHEX* | [T/**C**] | 1.13 (12) | 1043 / 449 / 51 | 0.51 |  | C: 0.179 | C: 0.211 | C: 0.189 | T: 0.448 | T: 0.432 | 0.16 |
| rs7923837 * | *HHEX* | [A/**G**] | 1.22 (7) | 907 / 582 / 69 | 0.19 |  | G: 0.232 | G: 0.211 | G: 0.193 | A: 0.375 | A: 0.000 | 0.40 |
| Shanghai |  |  |  |  |  |  |  |  |  |  |  |  |
| rs1111875 * | *HHEX* | [A/**G**] | 1.19 (7) | 800 / 655 / 113 | 0.31 |  | G: 0.281 | G: 0.322 | G: 0.409 | G: 0.442 | G: 0.142 | 0.26 |
| rs5015480 * | *HHEX* | [T/**C**] | 1.13 (12) | 1150 / 425 / 28 | 0.33 |  | C: 0.150 | C: 0.211 | C: 0.189 | T: 0.448 | T: 0.432 | 0.11 |
| rs7923837 * | *HHEX* | [A/**G**] | 1.22 (7) | 1036 / 531 / 56 | 0.21 |  | G: 0.198 | G: 0.211 | G: 0.193 | A: 0.375 | A: 0.000 | 0.27 |

* Analyzed separately for Beijing and Shanghai. Alleles in bold are the risk alleles for type 2 diabetes identified by previous studies and the alleles underlined are the risk alleles for type 2 diabetes or IFG observed in current samples.

†Power estimates were for type 2 diabetes vs. normal fasting glucose with the previously reported ORs (7-12), current sample size and MAFs observed in this study.

**Supplementary Table 2:** Associations with type 2 diabetes or its related quantitative traits in multiple regression models with both rs7754840 and rs7756992 as covariates.

|  | Type 2 diabetes vs. normal * | | Glucose† | | HbA1c† | | Inuslin† | | HOMA-B† | | HOMA-S† | | BMI† | |
| --- | --- | --- | --- | --- | --- | --- | --- | --- | --- | --- | --- | --- | --- | --- |
|  | OR (95% CI) | *P* | β(SE) | *P* | β (SE) | *P* | β (SE) | *P* | β (SE) | *P* | β (SE) | *P* | β(SE) | *P* |
| rs7754840 | 1.43 (1.14~1.79) | 0.0017 | 0.01 (0.05) | 0.87 | 0.01 (0.03) | 0.86 | -0.05 (0.02) | 0.0036 | -3.46 (1.59) | 0.0299 | 5.39 (0.11) | 0.0068 | -0.01 (0.01) | 0.07 |
| rs7756992 | 0.93 (0.74~1.16) | 0.50 | -0.07 (0.04) | 0.15 | -0.05 (0.03) | 0.07 | -0.04 (0.02) | 0.0166 | 0.17 (1.57) | 0.91 | 0.05 (0.02) | 0.0402 | -0.00 (0.01) | 0.34 |

Rs7754840 represented block 1 of the four *CDKAL1* variants (rs7754840 and 10946398) and rs7756992 represented block 2 (rs7756992 and rs9465871). * Logistical regression model was used for case-control analyses including the following covariates: genotypes of rs7754840, genotypes of rs7756992, age, gender, region and BMI. † Multivariate linear regression models containing covariates of genotypes of rs7754840, genotypes of rs7756992, age, gender, region and BMI (where appropriate) were applied for quantitative traits analyses.

**Supplementary Table 3:** Characteristics of participants with type 2 diabetes, IFG or NFG

|  | Type2 diabetes | IFG | NFG | *P* |
| --- | --- | --- | --- | --- |
| N (Male %) | 424 (48.8) | 878 (48.4) | 1908 (41.5) |  |
| Age (yrs) | 59.75.7 | 58.66.1 | 58.46.0 | 0.0001 |
| BMI (kg/m2) | 25.1 (23.2-27.6) | 25.2 (22.8-27.6) | 23.5 (21.3-25.9) | <0.0001 |
| Fasting glucose (mmol/L) | 8.983.05 | 6.010.34 | 5.060.36 | <0.0001 |
| HbA1C (%) | 7.812.01 | 5.850.45 | 5.650.41 | <0.0001 |
| Fasting insulin (pmol/L) | 88.2 (62.4-133.8) | 90.6 (66.0-121.2) | 77.7 (56.4-105.0) | <0.0001 |
| HOMA-B% | 60.638.5 | 99.434.0 | 126.244.7 | <0.0001 |
| HOMA-S% | 53.2 (37.9-72.5) | 57.1 (42.8-76.9) | 69.4 (51.5-94.3) | <0.0001 |

Data are meansSD, medians (interquartile range), or percentage unless otherwise indicated. *P* represents significance of the differences between individuals of type 2 diabetes, IFG and NFG. IFG, impaired fasting glucose. NFG, normal fasting glucose.

**Supplementary Figure 1.** Odds ratios and 95% CI of meta-analyses under an additive model for *CDKAL1* rs7754840 (in complete LD with rs10946398, r2 = 1.0) (A) and *CDKN2A/B* rs10811661 variants (B). The data in the Caucasian group are from the studies of WTCCC (12), UK2 (12), DGI (10) and FUSION (11) and the data in the Asian group are from studies in Japanese (the study of Japanese1 (24), Japanese 2 (23) and Japanese 3 (22)), Korean (25), Hong Kong Chinese (25) and Chinese Hans in this population. The black circles represent the point estimated beta and the grey area is proportional to the percentage weight of each study in the overall meta-analyses. Horizontal lines represented the 95% CI for the each individual study. The overall 95% CI for the meta-analyses is represented by diamond.
